# Supplementary material
Source: PubMed Central journal article supplement (PMC2916493)
Supplement: supp_76_15_5032__2.pdf [file supp_76_15_5032__2.pdf]

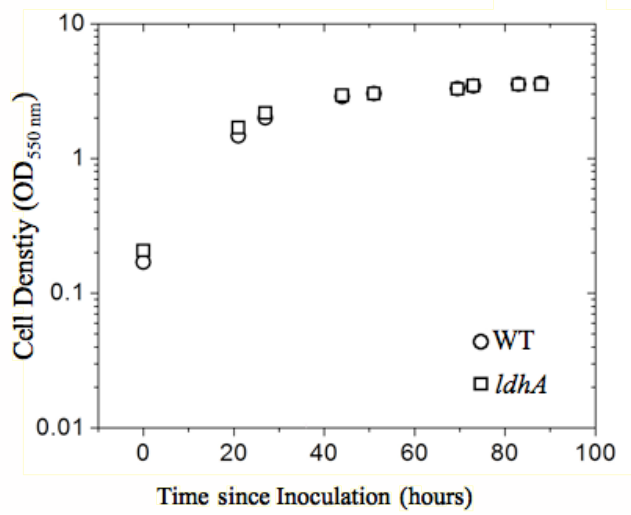

**Figure S2:** Photoautotrophic growth of wild-type WT (O) and *ldhA* (□) cells of *Synechococcus* 7002 under constant light. The optical density at 550 nm was monitored to assess growth.
