# Supplementary material
Source: PubMed Central journal article supplement (PMC2916493)
Supplement: supp_76_15_5032__3.pdf [file supp_76_15_5032__3.pdf]

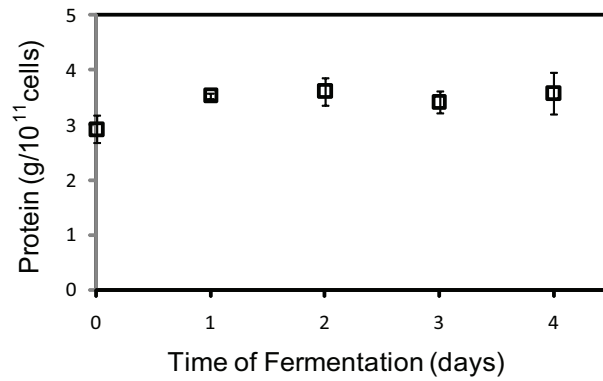

**Figure S3:** Total protein concentration of *Synechococcus* 7002 over 4 days of autofermentation. Protein concentration does not change over 4 days of fermentation indicating that protein is not oxidized as a source of carbon or reductant during fermentation. Protein concentration was determined via the bicinchoninic acid assay using bovine serum albumin as a standard.
